# Supplementary material for: Synthesis and spectroscopic studies of berberine immobilized modified cellulose material
Source: Royal Society of Chemistry journal article supplement (doi:10.1039/c4ra06015f), 2014-01-01
Supplement: c4ra06015f1.pdf [file c4ra06015f1.pdf]

## Synthesis and spectroscopic studies of Berberine immobilized cellulose material

Chandrasekhar Reddy Gade, and Nagendra K. Sharma\*

School of Chemical Sciences, National Institute of Science Education and Research

(NISER)

IOP Campus, Sachivalaya Marg, Sainik School (P.O)

Bhubaneswar-751005, Odisha, India

Phone: +91-674-2304130, Fax: +91-674-2302436

Email: [nagendra@niser.ac.in](mailto:nagendra@niser.ac.in)

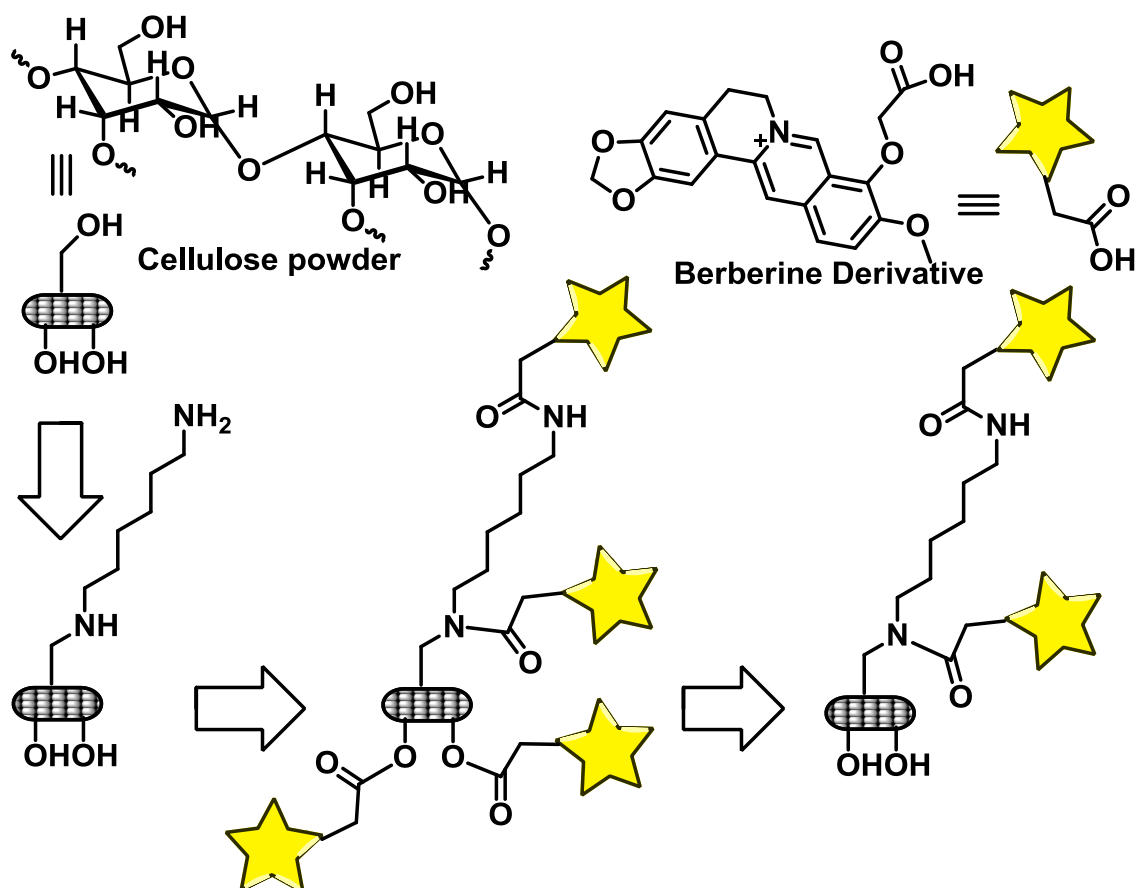

## Contents

|                                                                                                  |    |
|--------------------------------------------------------------------------------------------------|----|
| 1. Synthesis of Berberine Derivatv .....                                                         | 3  |
| 2. <sup>1</sup> H-NMR of Berberine ester Derivauve ester .....                                   | 4  |
| Figure S1. <sup>1</sup> H-NMR of ester functionalized modified berberine.....                    | 4  |
| 3. <sup>1</sup> H-NMR of Berberine acid Derivative (4) .....                                     | 5  |
| Figure S2. <sup>1</sup> H-NMR of acid functionalized modified berberine .....                    | 5  |
| 3. <sup>13</sup> C-NMR of cellulose (1).....                                                     | 7  |
| Figure S4. <sup>13</sup> C-NMR of native cellulose (1).....                                      | 7  |
| 4. <sup>1</sup> H-NMR of cellulose (1).....                                                      | 8  |
| 5. SEM image of Native Cellulose (1).....                                                        | 9  |
| 6. Energy dispersive X-ray analysis (EDX) of Control sample Native Cellulose (1).....            | 10 |
| 7. Amino functionalized modified Cellulose (3) .....                                             | 12 |
| 8. Acid functionalized Berbarine derivative (4).....                                             | 13 |
| 9. Energy dispersive X-ray analysis (EDX) of Berberine Derivative (4) .....                      | 14 |
| 10. Berberine Immobilized modified cellulose derivative (5) .....                                | 16 |
| 11. Modified berberine immobilized Cellulose (6).....                                            | 17 |
| 12. Energy dispersive X-ray analysis (EDX) of Berberine Immobilized modified Cellulose (6) ..... | 18 |
| 13. Fluorescence microscopic images of acid functionalized berberine derivative (4) .....        | 20 |
| 11. Fluorescence microscopic images of berberine immobilized cellulose (5) .....                 | 21 |
| 12. Fluorescence microscopic images of berberine immobilized cellulose (6) .....                 | 22 |
| 13. Confocal Image of berberine immobilized cellulose (6).....                                   | 23 |

## 1. Synthesis of Berberine Derivative\*

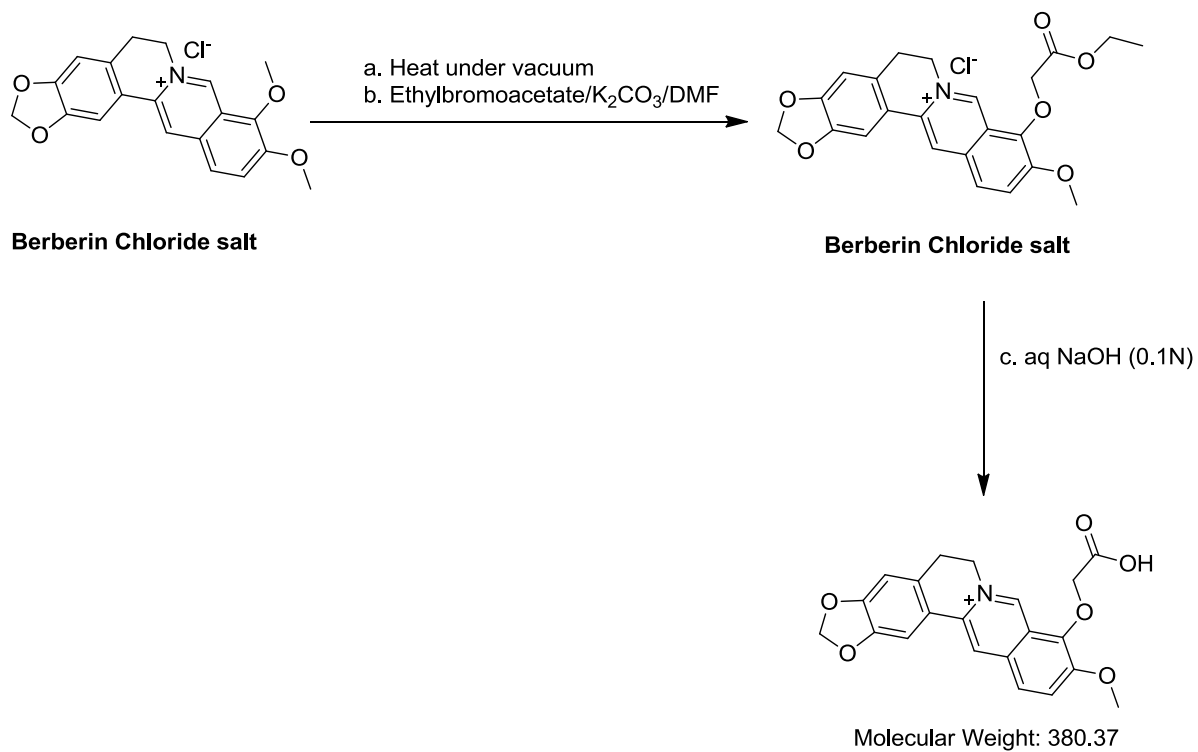

\*W.-J. Zhang et al. *Bioorg. Med. Chem.* 15 (2007) 5493–5501

2.  $^1\text{H-NMR}$  of Berberine ester Derivative ester

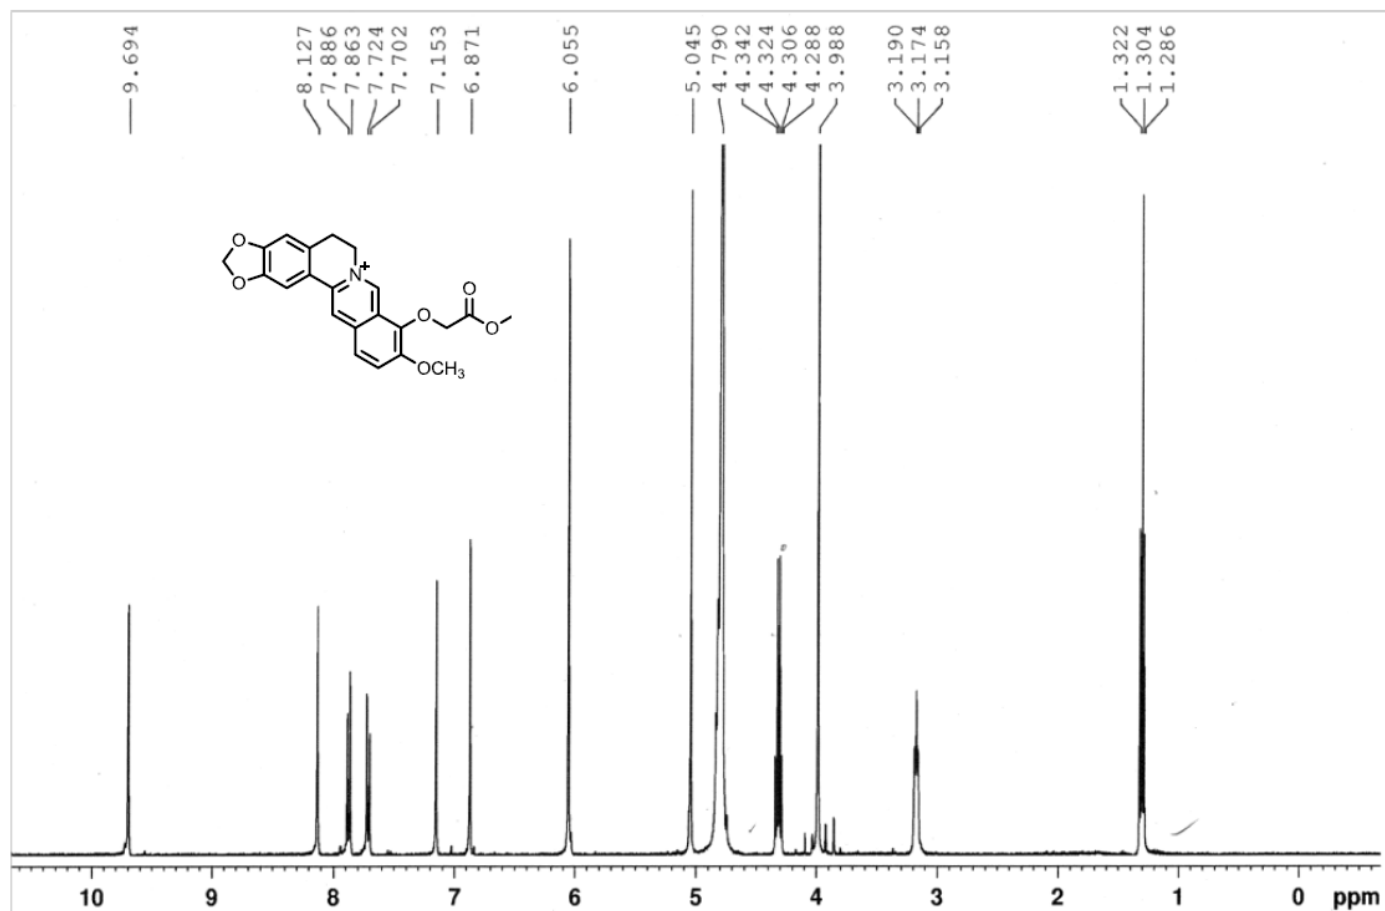

**Figure S1.**  $^1\text{H-NMR}$  of ester functionalized modified berberine

### 3. $^1\text{H-NMR}$ of Berberine acid Derivative (4)

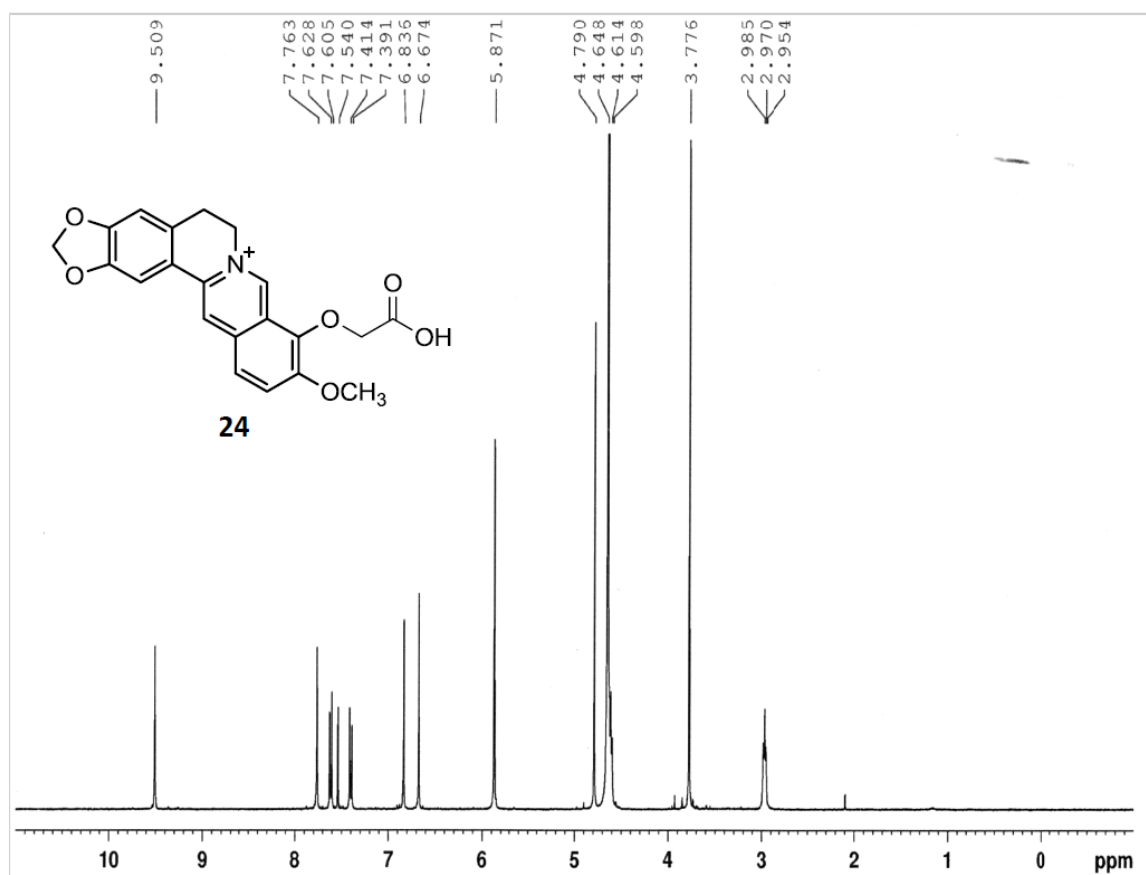

**Figure S2.**  $^1\text{H-NMR}$  of acid functionalized modified berberine

# Display Report

## Analysis Info

Analysis Name D:\Data\APRIL\_JUNE-2013\NKS\NKS-Cell-Mass\050312-NKS-CEL-BERB.d  
Method Pso\_tune\_wide.m  
Sample Name TBPC  
Comment

Acquisition Date 3/5/2012 5:27:40 PM  
Operator RAJESH VASHISTH  
Instrument micrOTOF-Q II 10337

## Acquisition Parameter

|             |            |                       |           |                  |           |
|-------------|------------|-----------------------|-----------|------------------|-----------|
| Source Type | ESI        | Ion Polarity          | Positive  | Set Nebulizer    | 0.4 Bar   |
| Focus       | Not active | Set Capillary         | 4500 V    | Set Dry Heater   | 180 °C    |
| Scan Begin  | 50 m/z     | Set End Plate Offset  | -500 V    | Set Dry Gas      | 4.0 l/min |
| Scan End    | 3000 m/z   | Set Collision Cell RF | 650.0 Vpp | Set Divert Valve | Waste     |

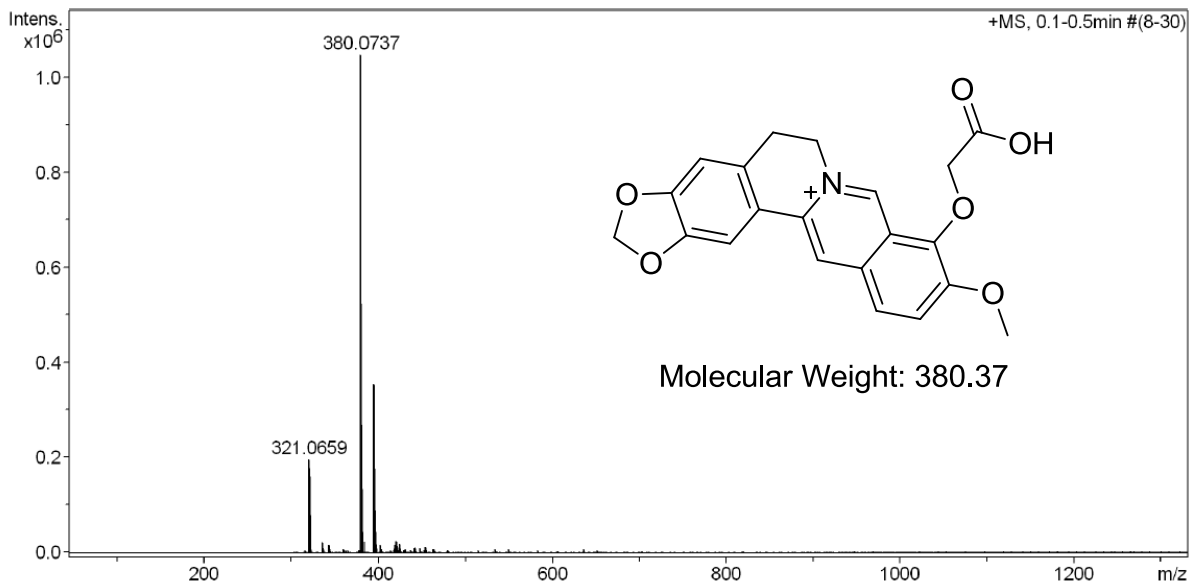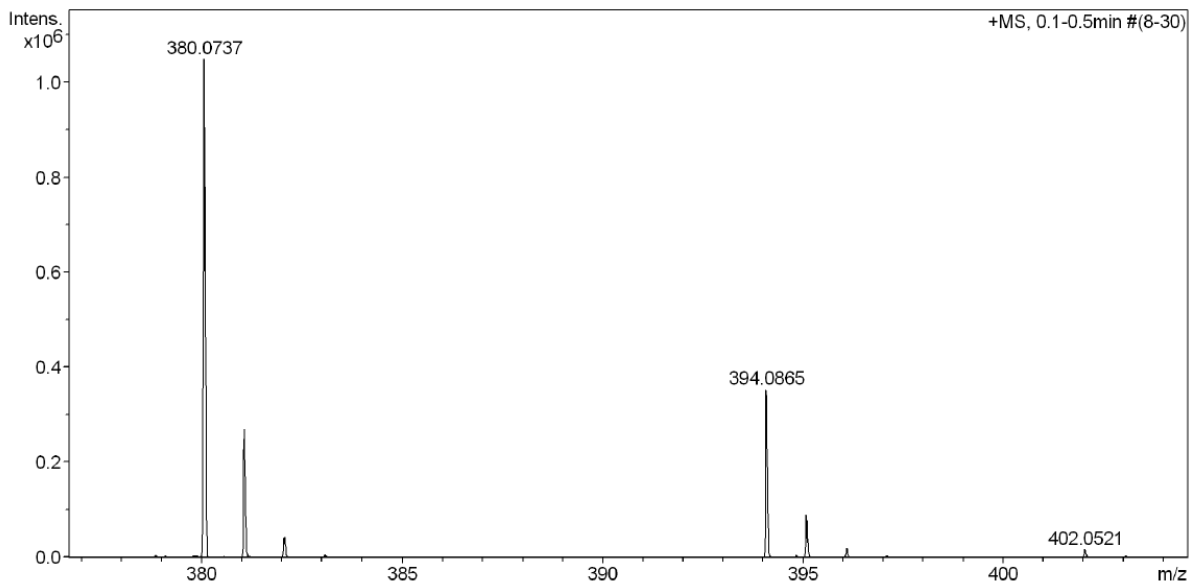

**Figure S3.** ESI-Mass of Berberine in MeOH:H<sub>2</sub>O:Fomic acid (50:49.9:0.1)

### 3. $^{13}\text{C}$ -NMR of cellulose (1)

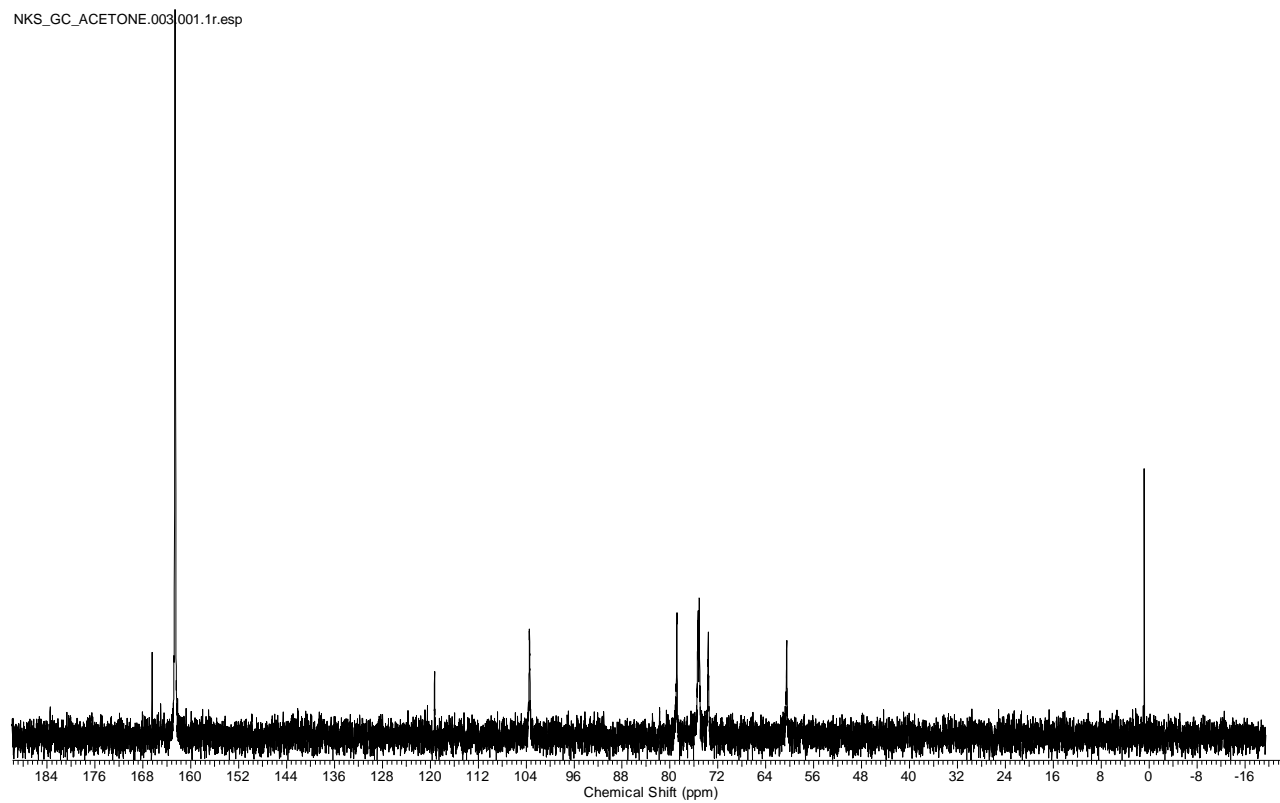

**Figure S4.**  $^{13}\text{C}$ -NMR of native cellulose (1)

#### 4. $^1\text{H}$ -NMR of cellulose (1)

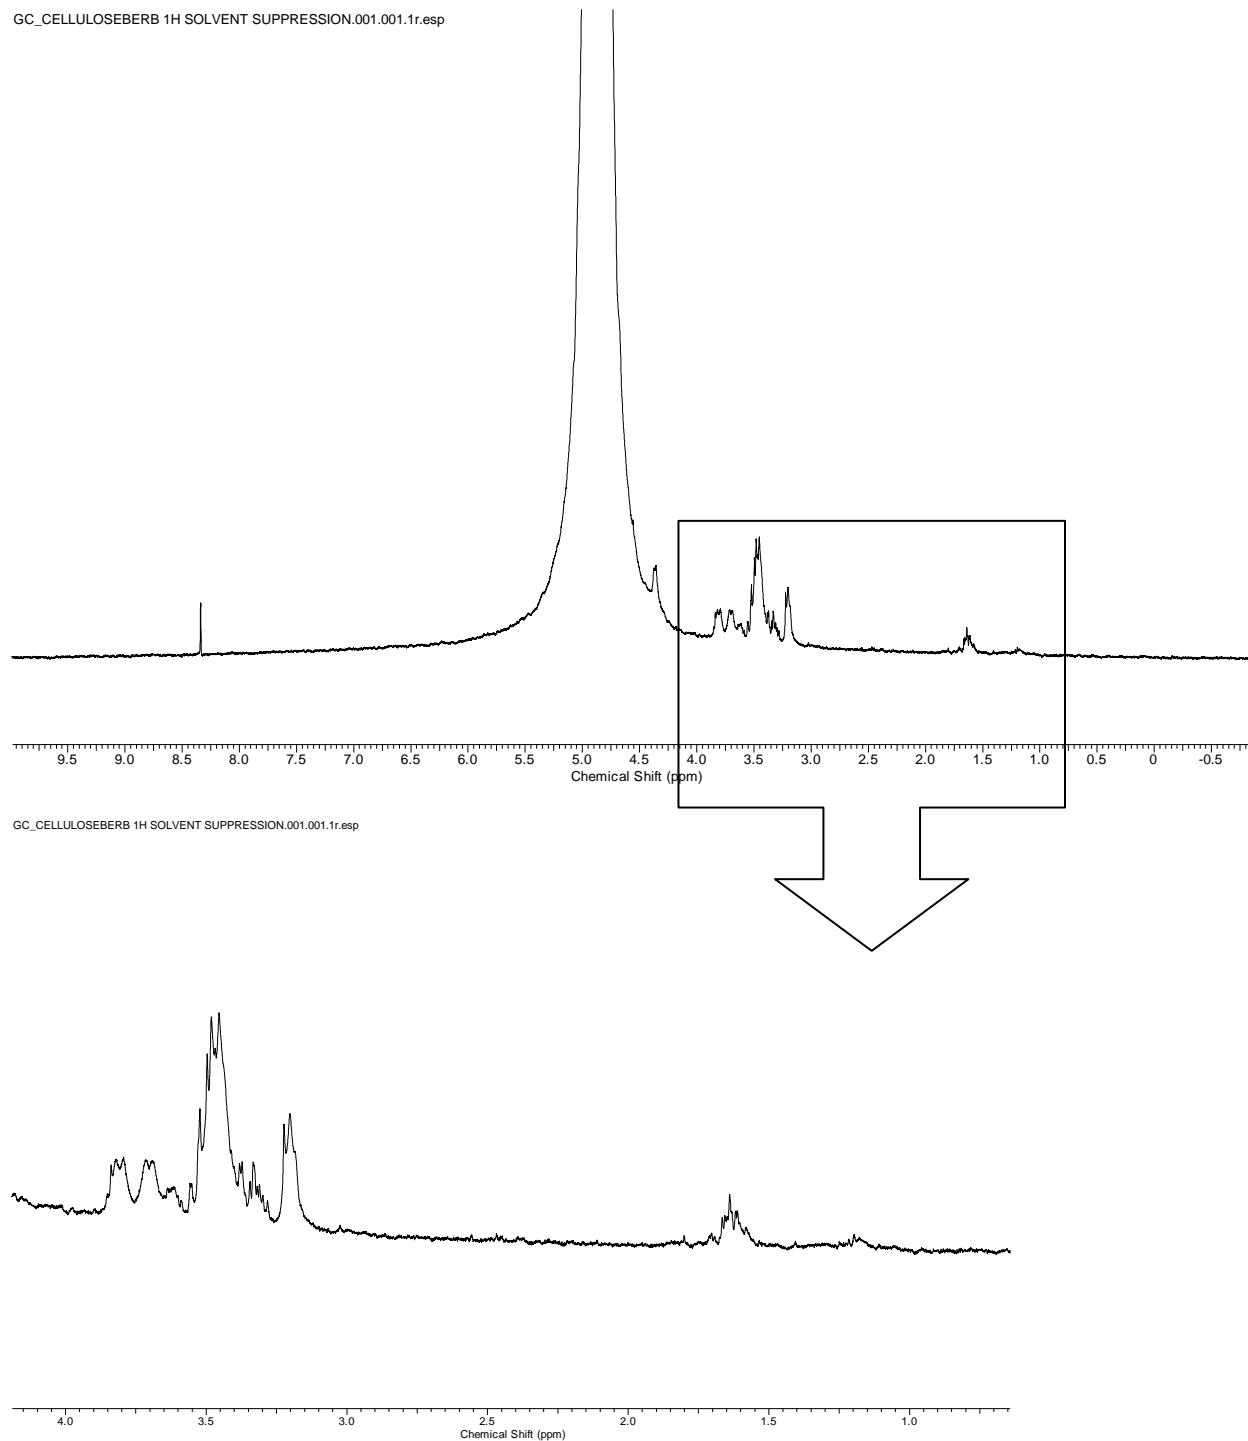

**Figure S5.**  $^1\text{H}$ -NMR of native cellulose (1)



## 5. SEM image of Native Cellulose (1)

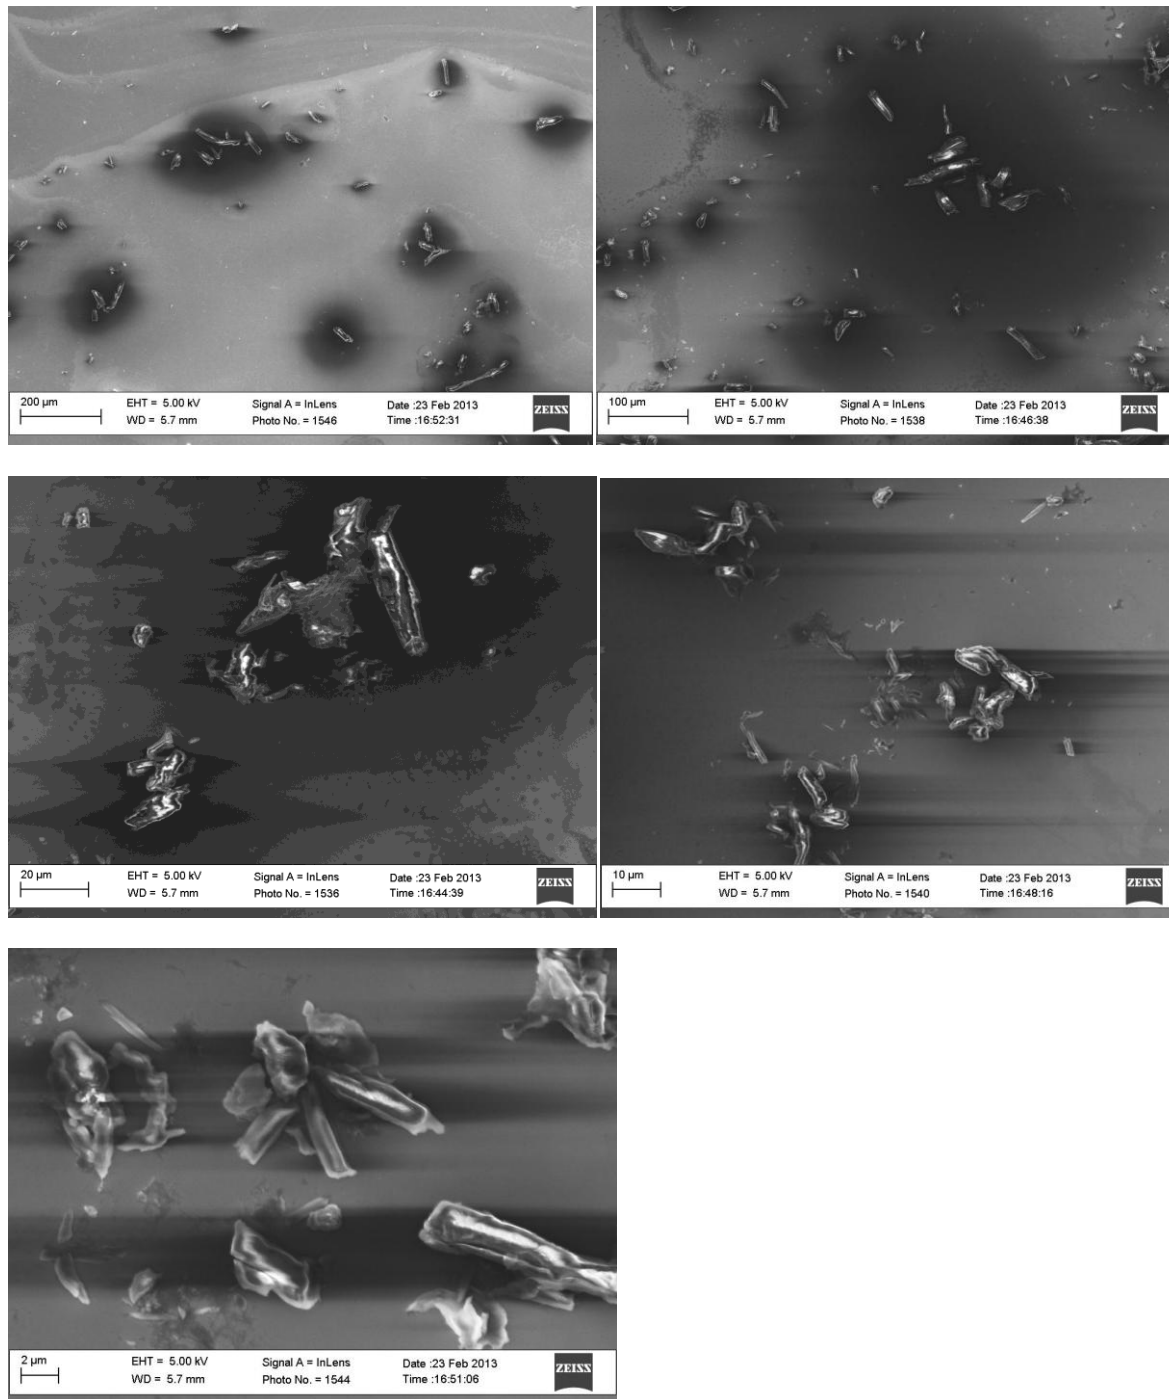

**Figure S6.** SEM image of native cellulose

## 6. Energy dispersive X-ray analysis (EDX) of Control sample Native Cellulose (1)

Energy-dispersive X-ray spectroscopy (EDS, EDX or XEDS) or Energy dispersive X-ray analysis (EDXA) is an analytical technique used for the elemental analysis or chemical characterization of sample

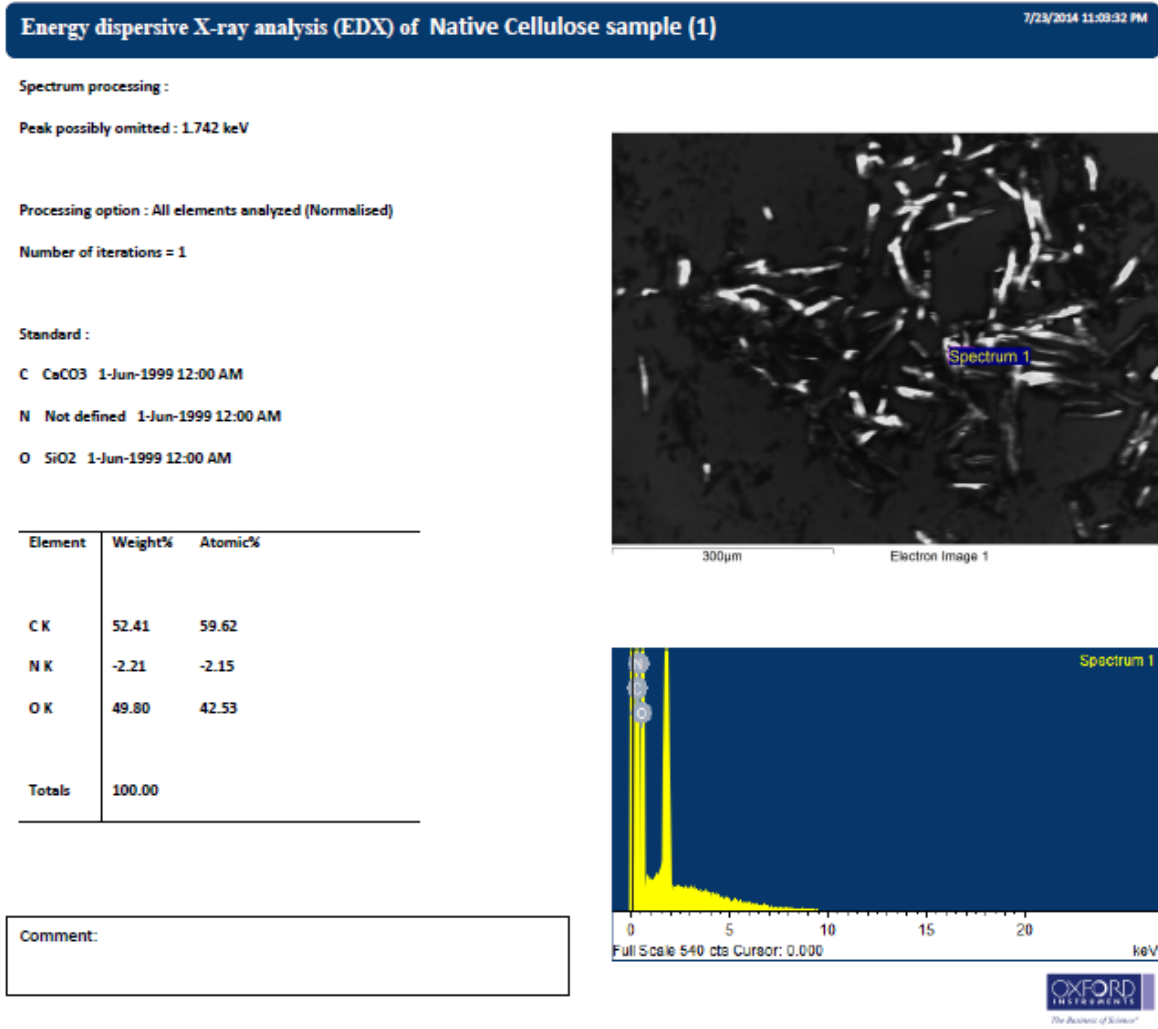

**Figure S7.** EDX of Control sample Native Cellulose (1)

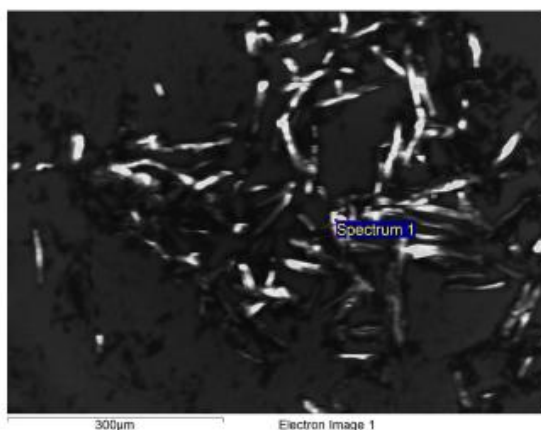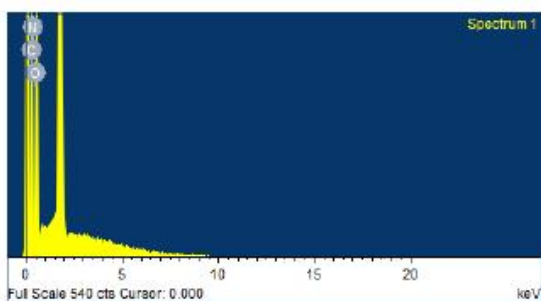

### Quantitative results

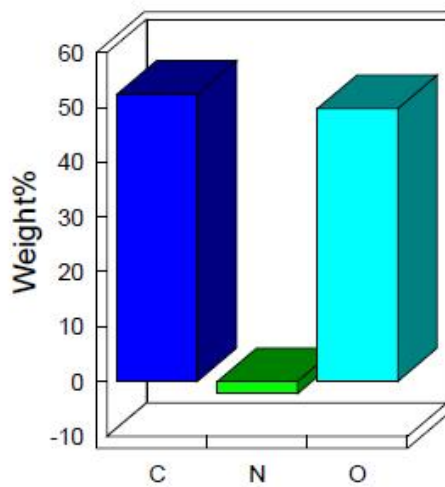

Comment:

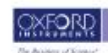

Figure S8. EDX of Control sample Native Cellulose (1)

## 7. Amino functionalized modified Cellulose (3)

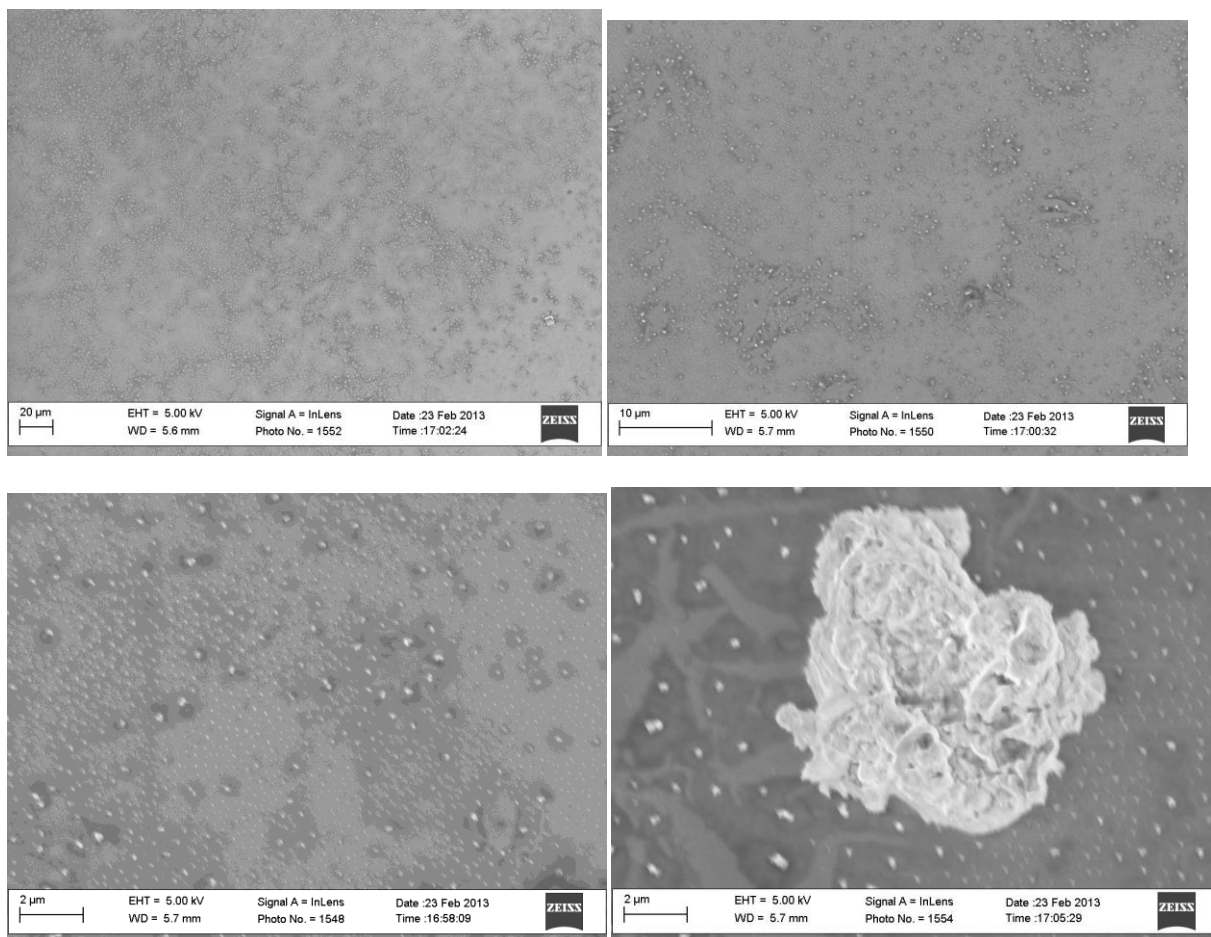

**Figure S9.** SEM image of amino functionalized modified cellulose

## 8. Acid functionalized Berberine derivative (4)

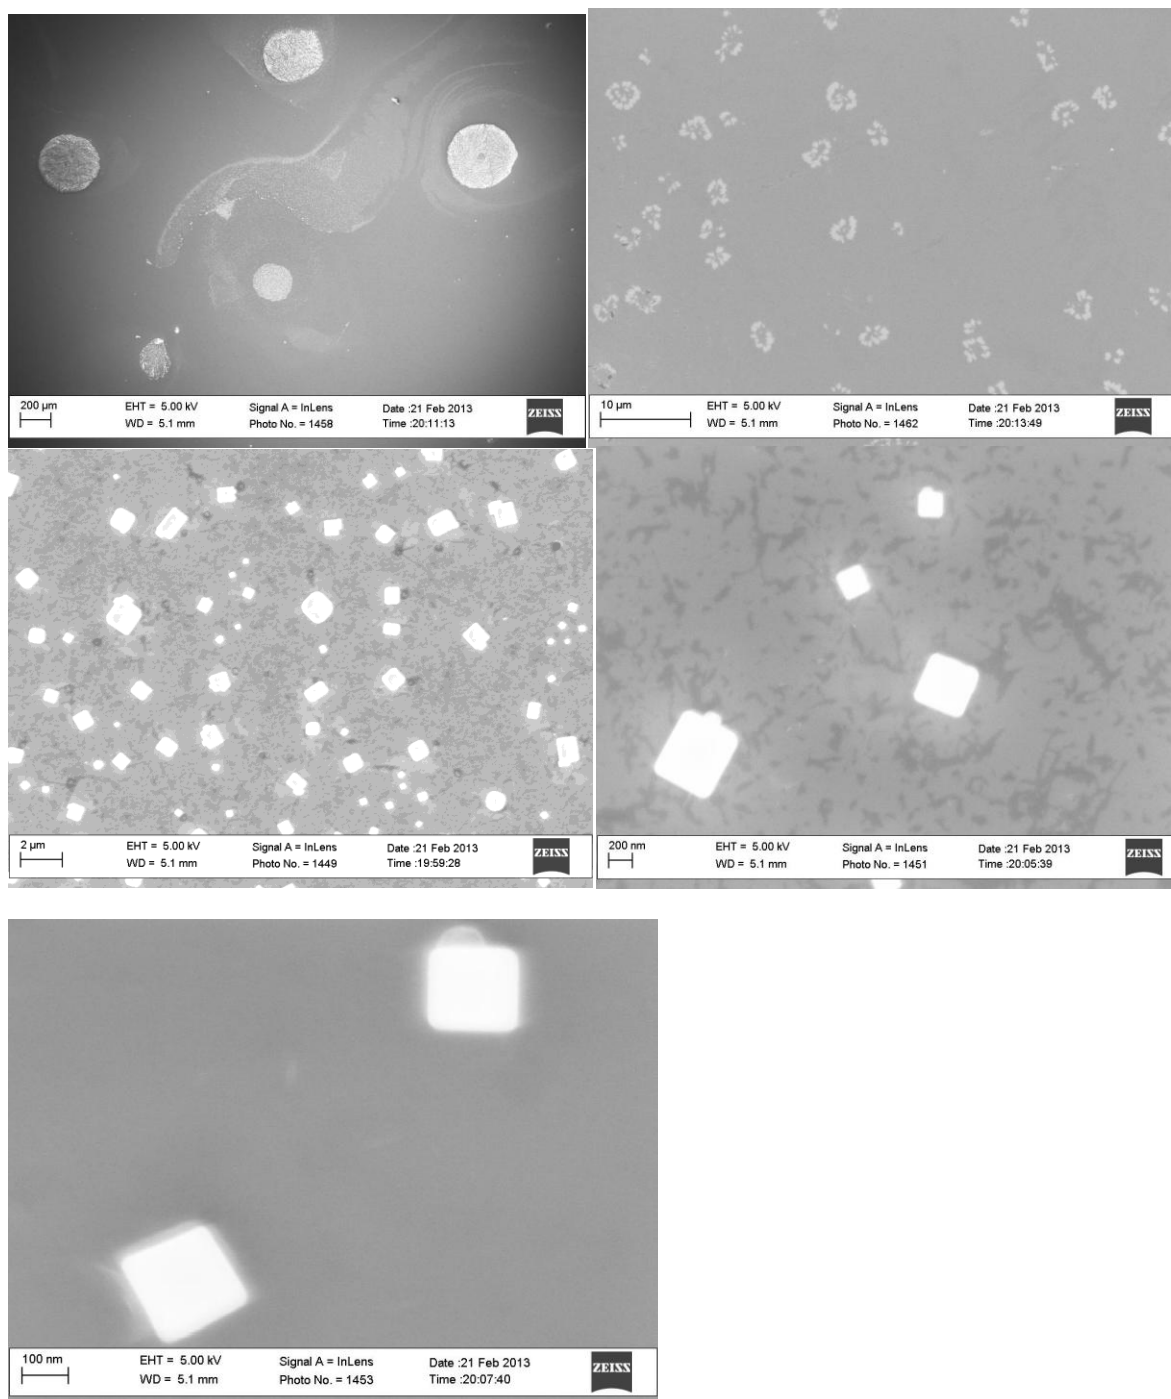

**Figure S10.** SEM image of modified berberine derivative

## 9. Energy dispersive X-ray analysis (EDX) of Berberine Derivative (4)

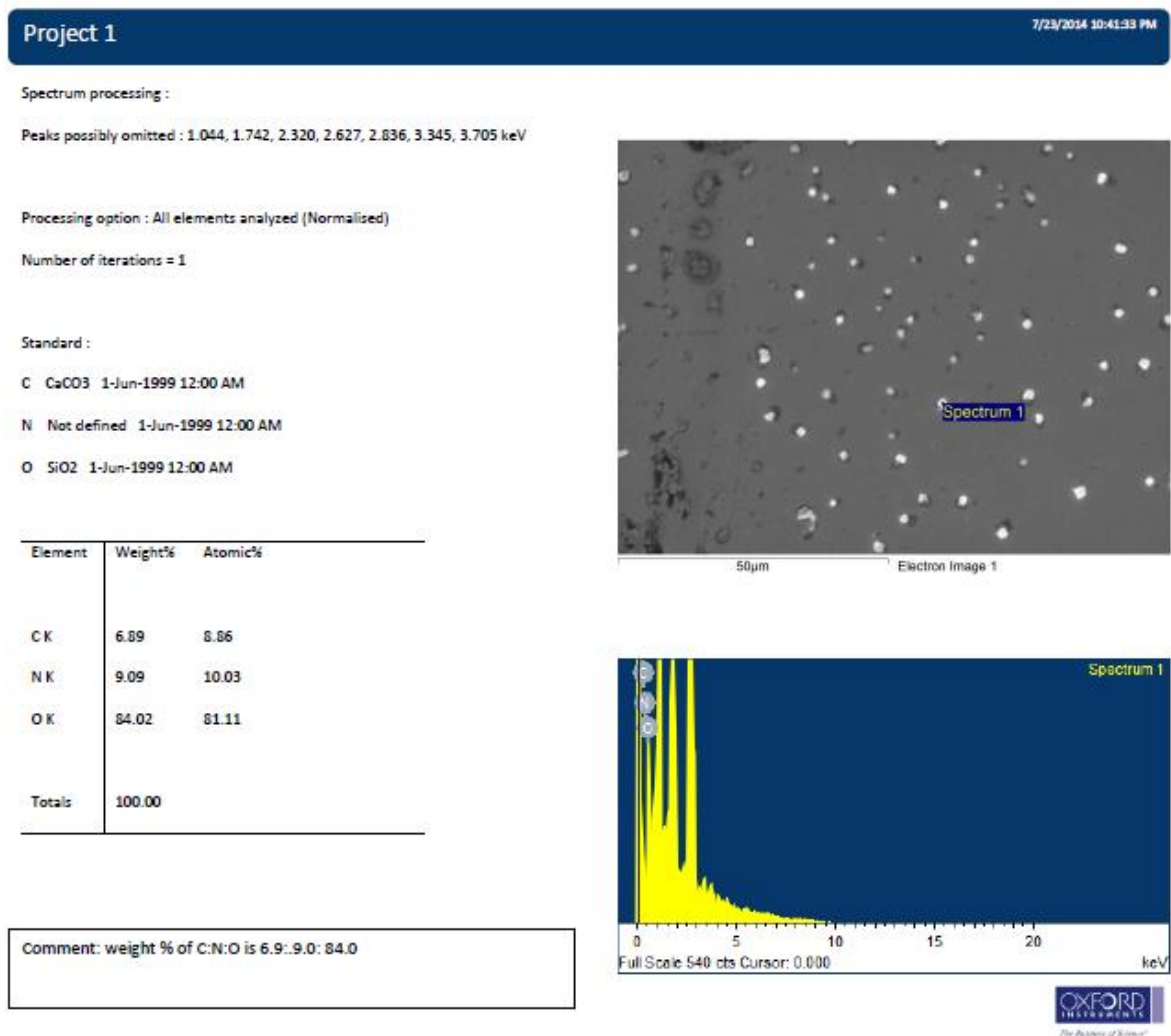

**Figure S11.** EDX of Berberine Derivative (4)

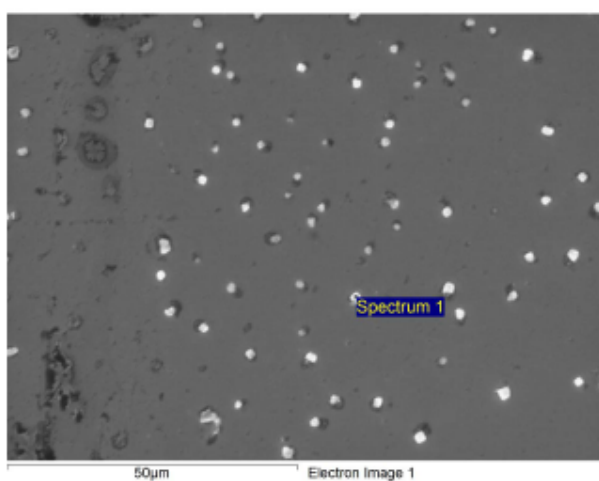

### Quantitative results

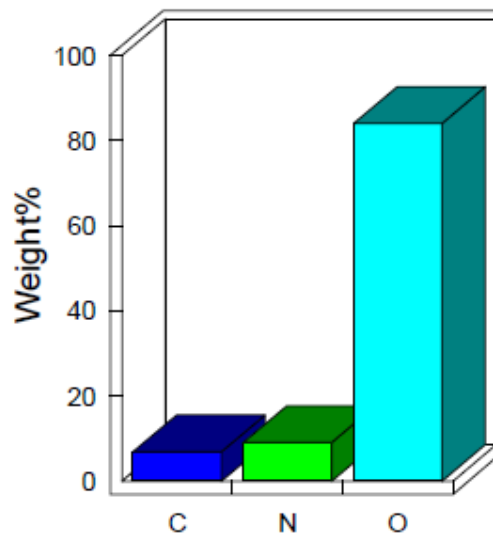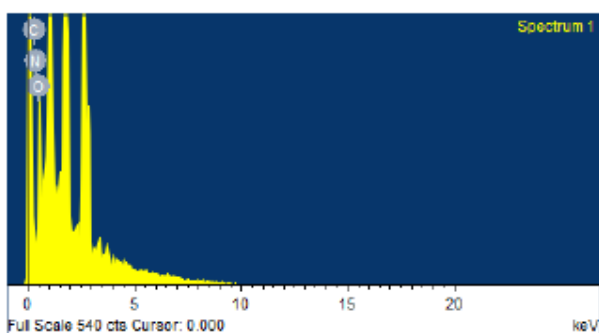

Comment:

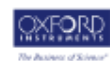

Figure S12. EDX of Berberine Derivative (4)

## 10. Berberine Immobilized modified cellulose derivative (5)

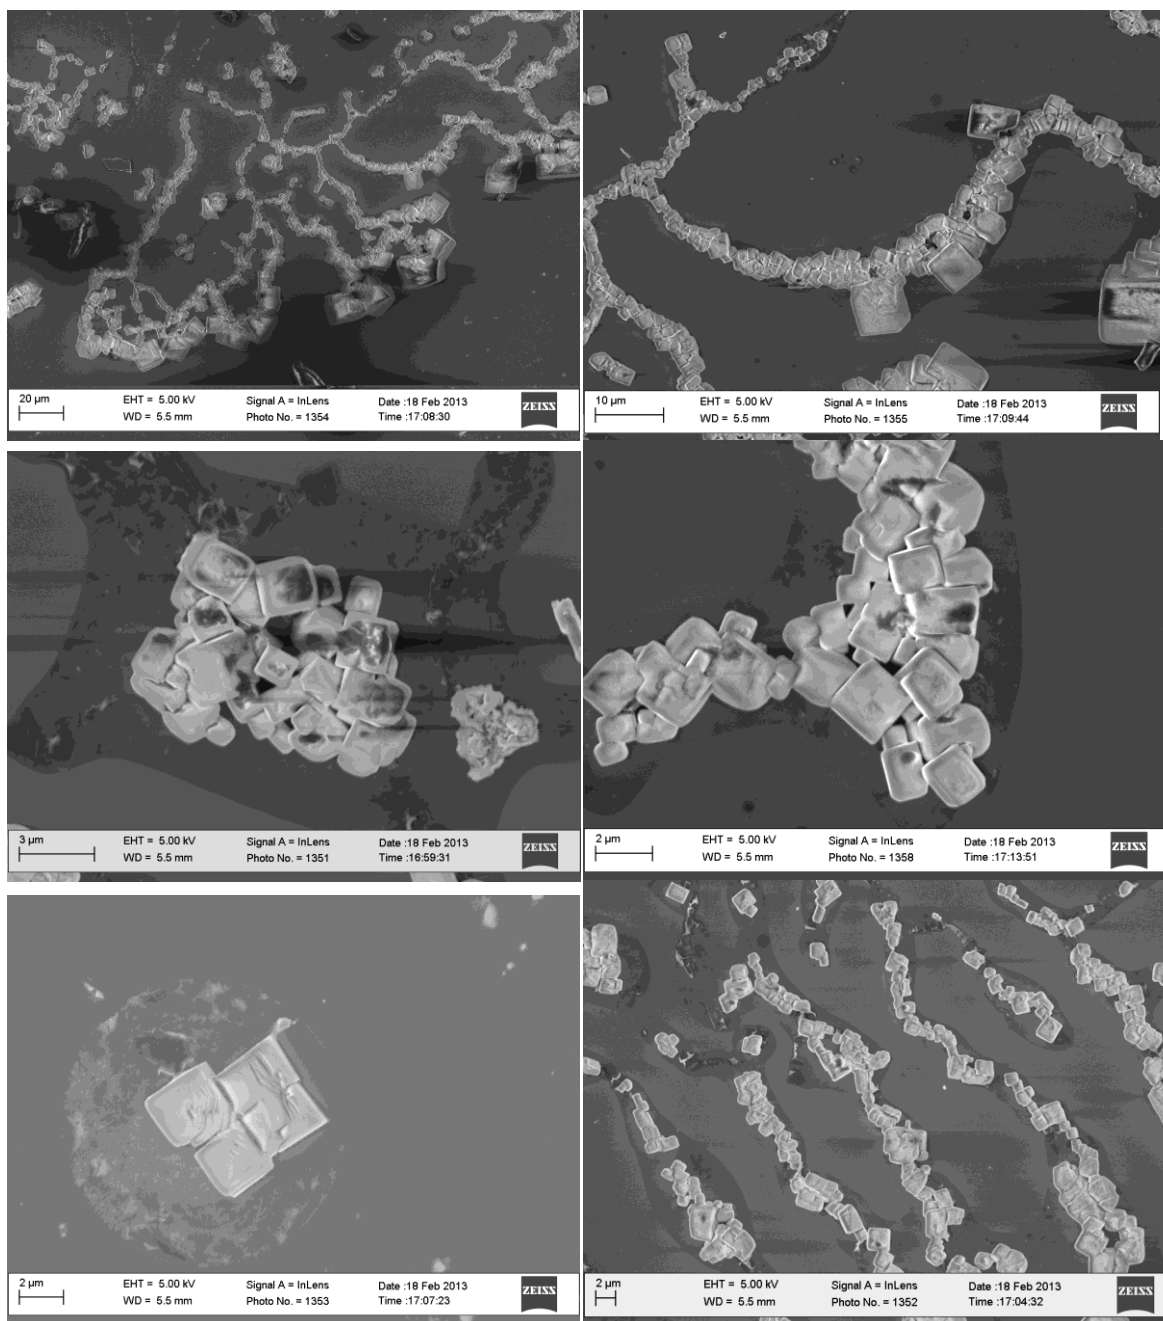

**Figure S13.** SEM image of Berberine immobilized modified cellulose via ester or/and amide bond



## 11. Modified berberine immobilized Cellulose (6)

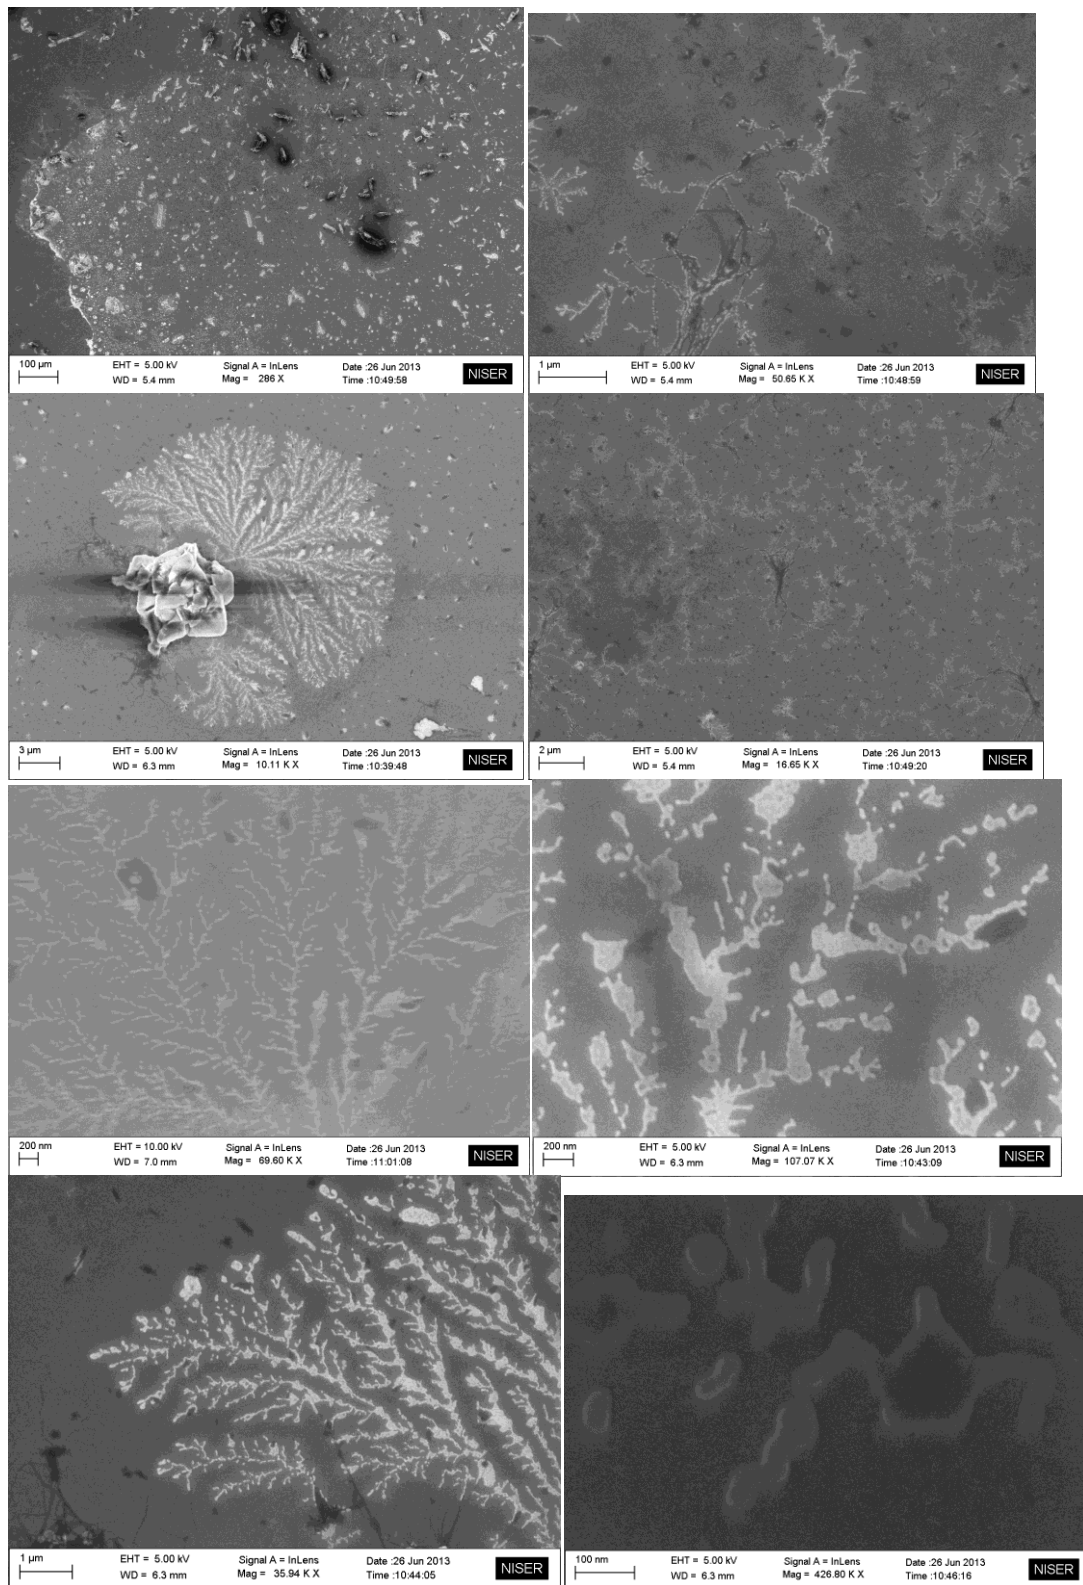

**Figure S14.** SEM image of berberine immobilized modified cellulose via bond amide

## 12. Energy dispersive X-ray analysis (EDX) of Berberine Immobilized modified Cellulose (6)

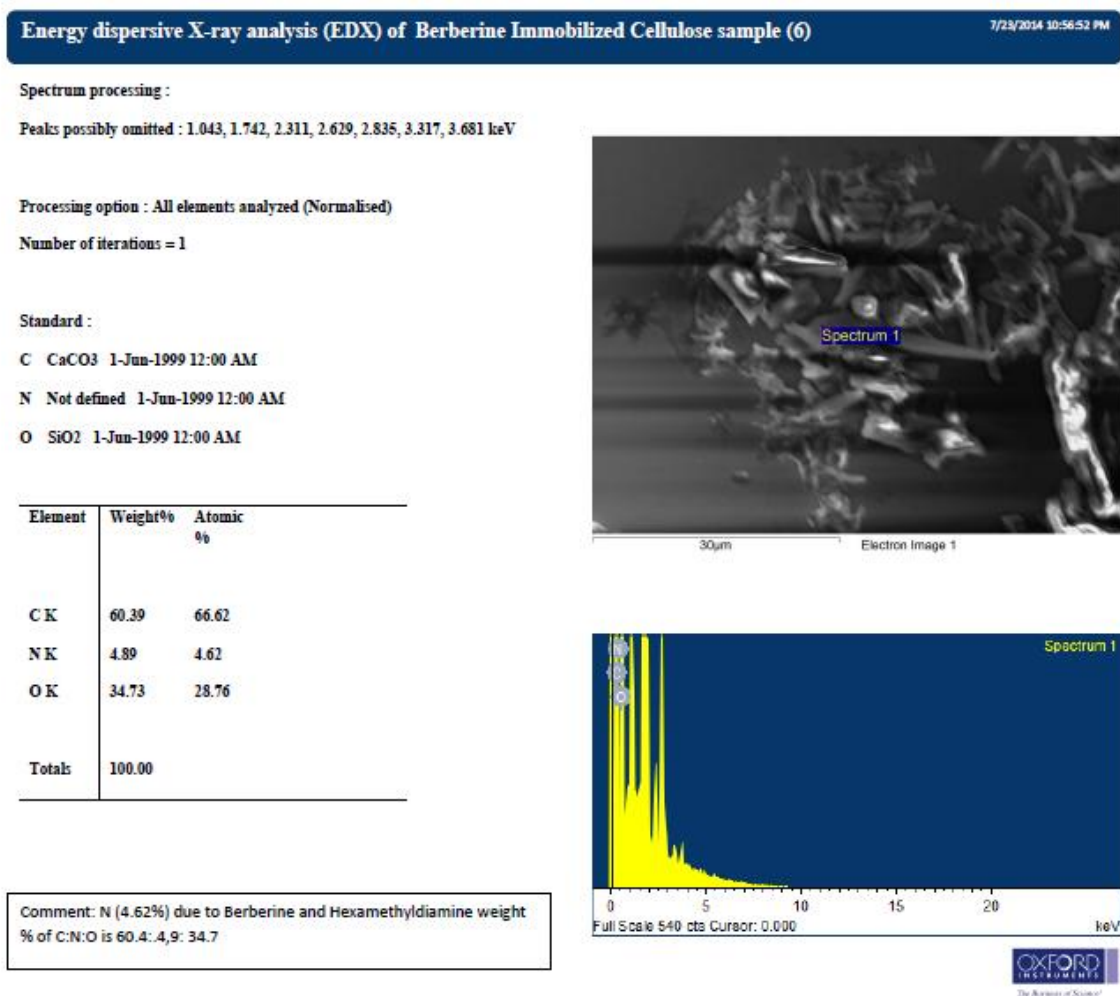

**Figure S15.** EDX of Berberine Immobilized modified Cellulose (6)

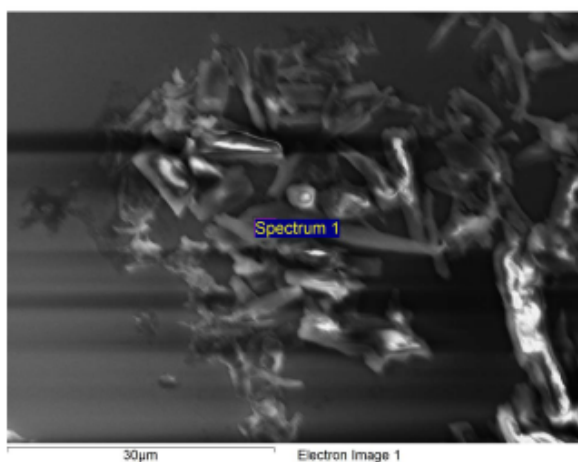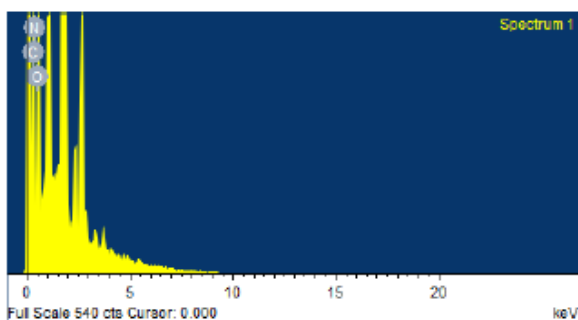

Quantitative results

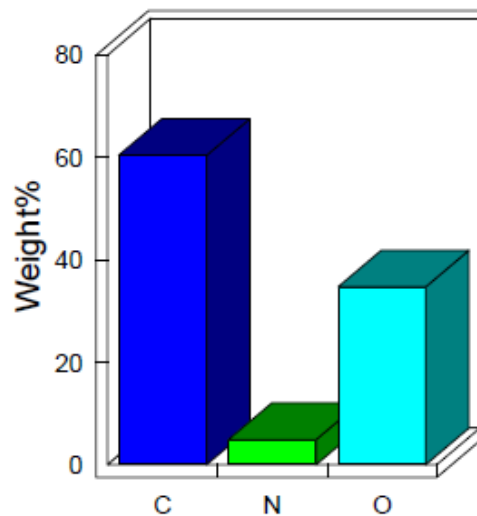

Comment:  
N (4.62%) due to Berberine and Hexamethyldiamine

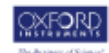

Figure S16. EDX of Berberine Immobilized modified Cellulose (6)

13. Fluorescence microscopic images of acid functionalized berberine derivative (4)

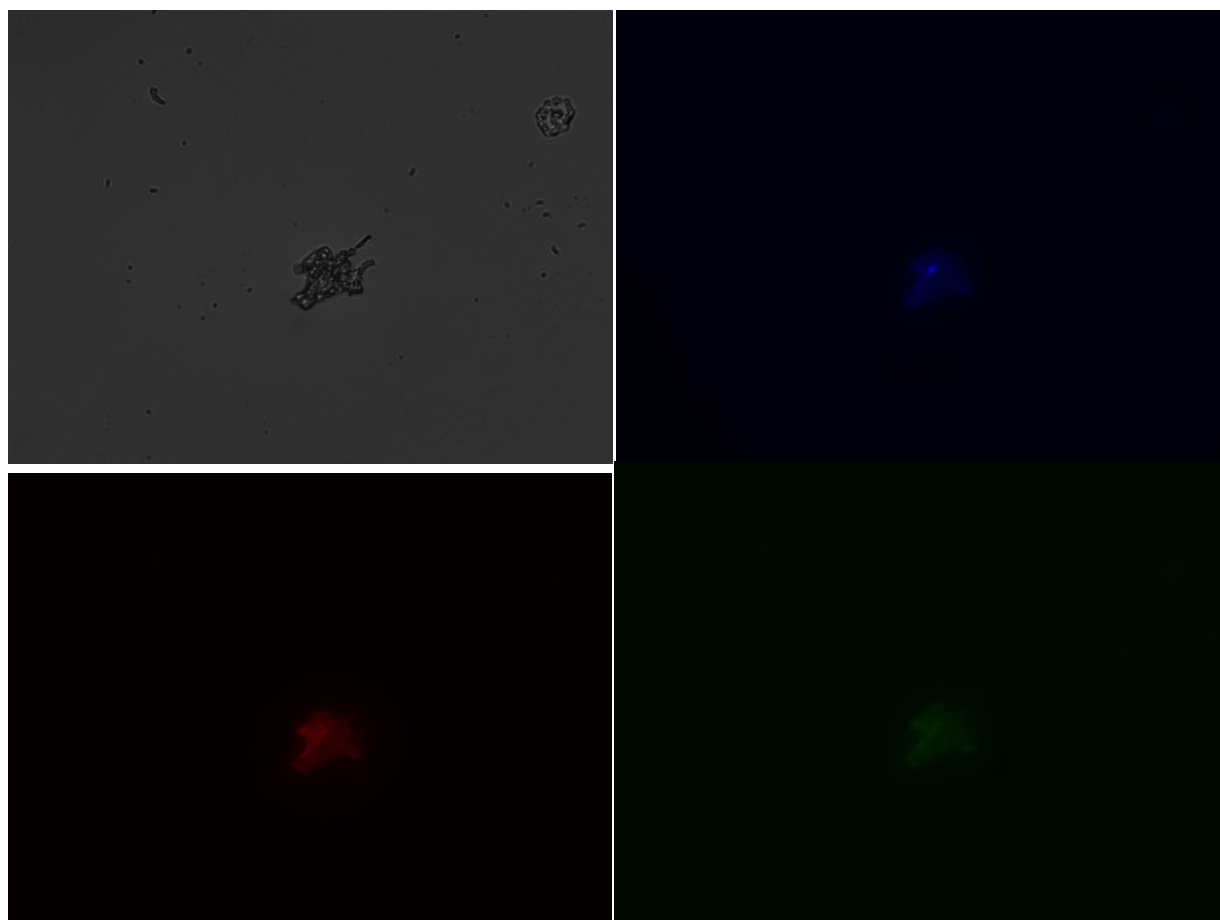

**Figure S17.** Fluorescence microscopic images of acid functionalized berberine derivative

11. Fluorescence microscopic images of berberine immobilized cellulose (5)

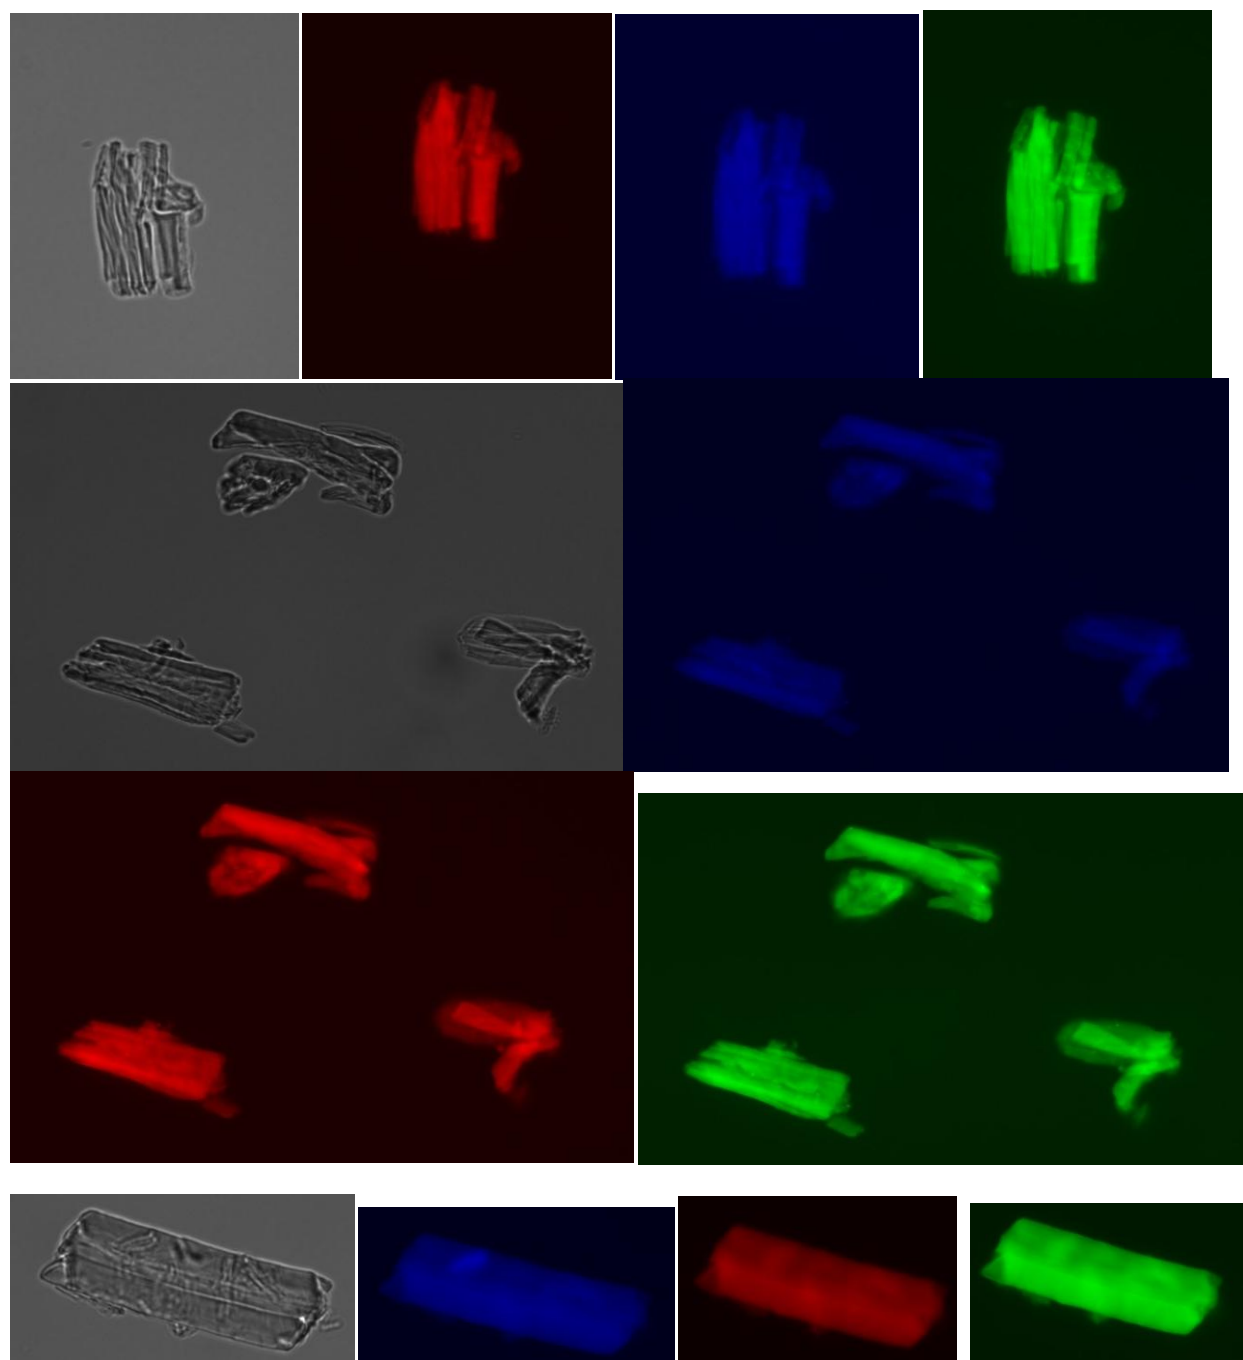

**Figure S18.** Fluorescence microscopic images of berberine immobilized cellulose (5)

12. Fluorescence microscopic images of berberine immobilized cellulose (6)

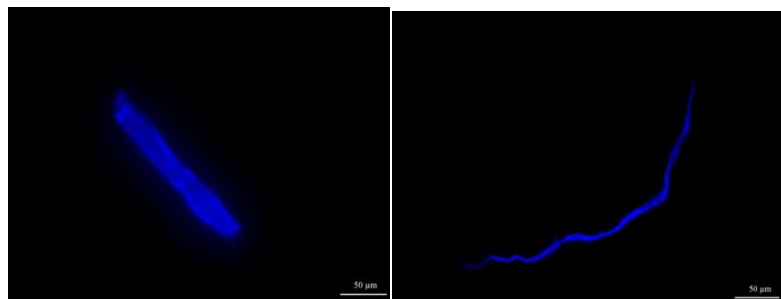

**Figure S19.** Fluorescence microscopic images of berberine immobilized cellulose

13. Confocal Image of berberine immobilized cellulose (6)

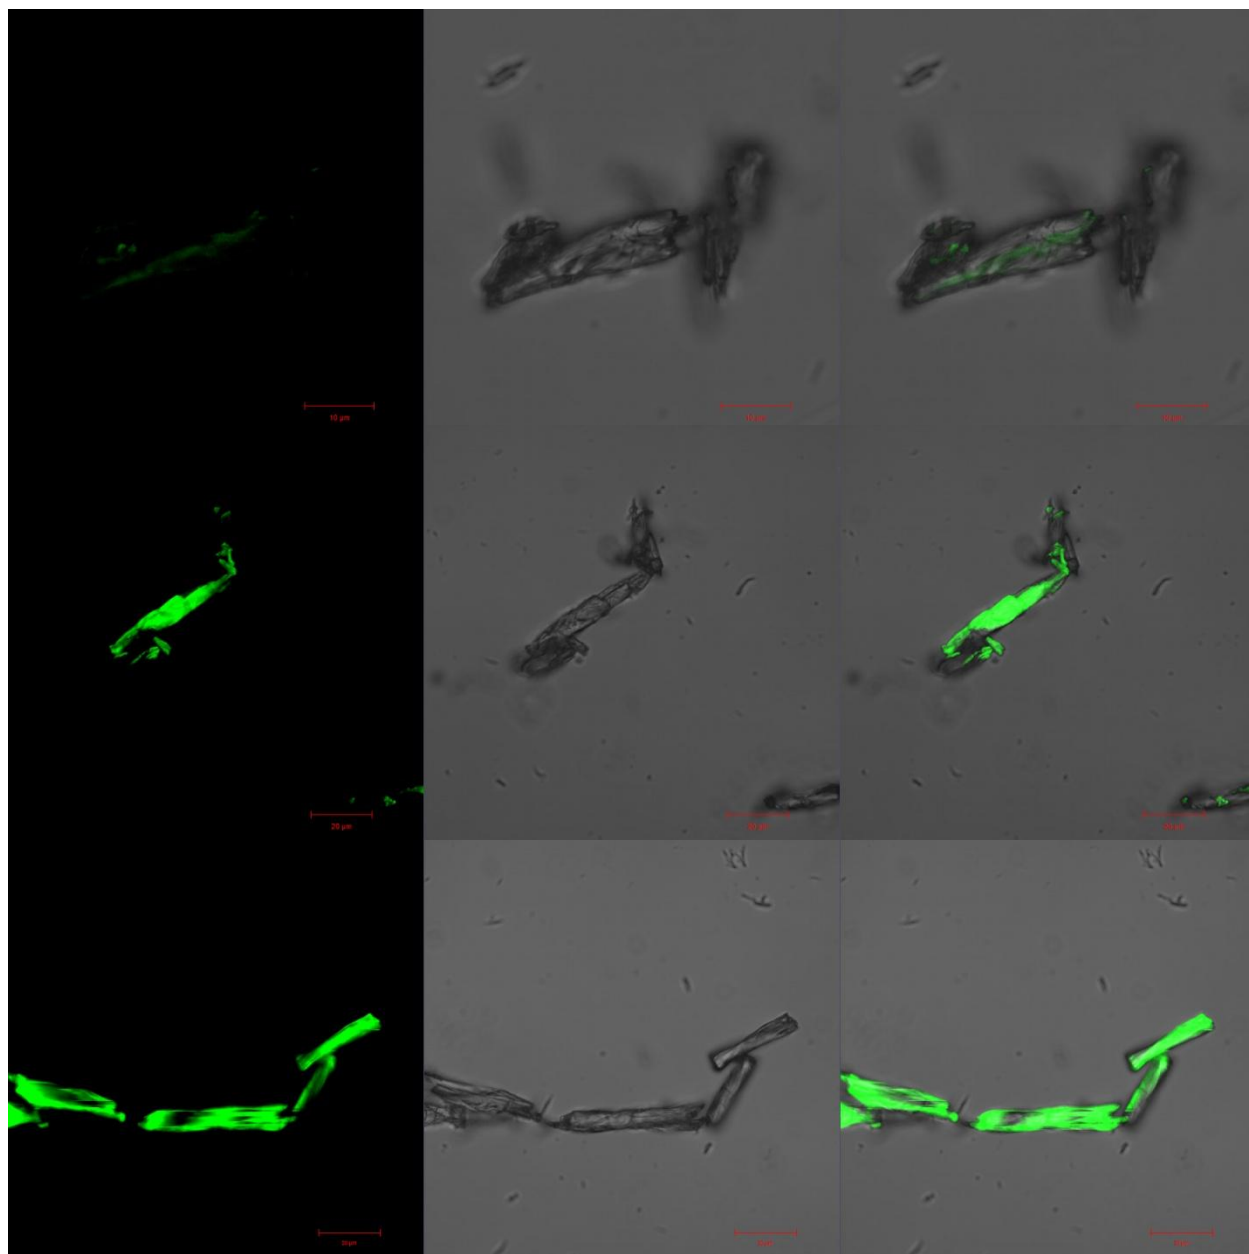

**Figure S20.** Confocal Image of Berberine immobilized cellulose at resolution of 30 $\mu$ m

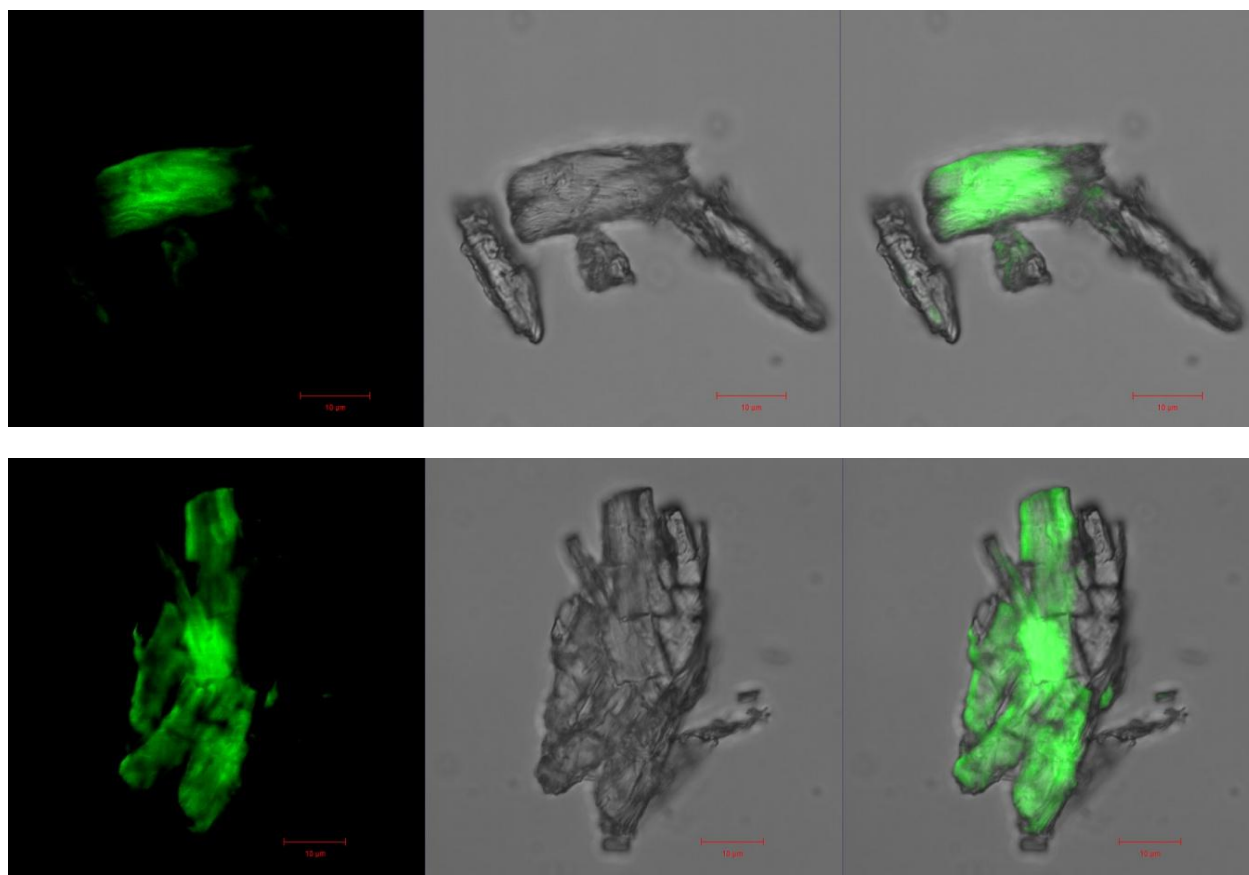

**Figure S21.** Confocal Image of berberine immobilized cellulose resolution of  $5\mu\text{m}$
